# Supplementary material
Source: PubMed Central journal article supplement (PMC3236788)

## Supporting Information

# Investigating the Antimalarial Action of 1,2,4-Trioxolanes with Fluorescent Chemical Probes

*Carmony L. Hartwig<sup>†,◇</sup>, Erica M.W. Lauterwasser<sup>‡</sup>, Sumit S. Mahajan<sup>‡</sup>, Jonathan M. Hoke<sup>†</sup>, Roland A. Cooper<sup>†,§\*</sup>, and Adam R. Renslo<sup>‡\*</sup>*

<sup>†</sup> Department of Biological Sciences, Old Dominion University, Norfolk, VA.

<sup>◇</sup> Malaria Research and Reference Reagent Resource Center (MR4), American Type Culture Collection, Manassas, VA.

<sup>‡</sup> The Small Molecule Discovery Center and Department of Pharmaceutical Chemistry, University of California, San Francisco, CA.

<sup>§</sup> Department of Natural Sciences and Mathematics, Dominican University of California, San Rafael, CA.

\*To whom correspondence should be addressed. RAC: Phone: (415) 482-1887. Fax: (415) 482-1972. E-mail: [roland.cooper@dominican.edu](mailto:roland.cooper@dominican.edu). ARR: Phone: (415) 514-9698; fax: (415) 514-4507; E-mail: [adam.renslo@ucsf.edu](mailto:adam.renslo@ucsf.edu).

## Contents

S-3.  $^1\text{H}$  NMR spectra of final compounds **5-8** tested in parasites.

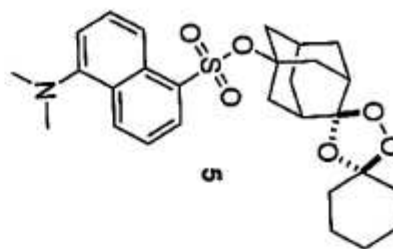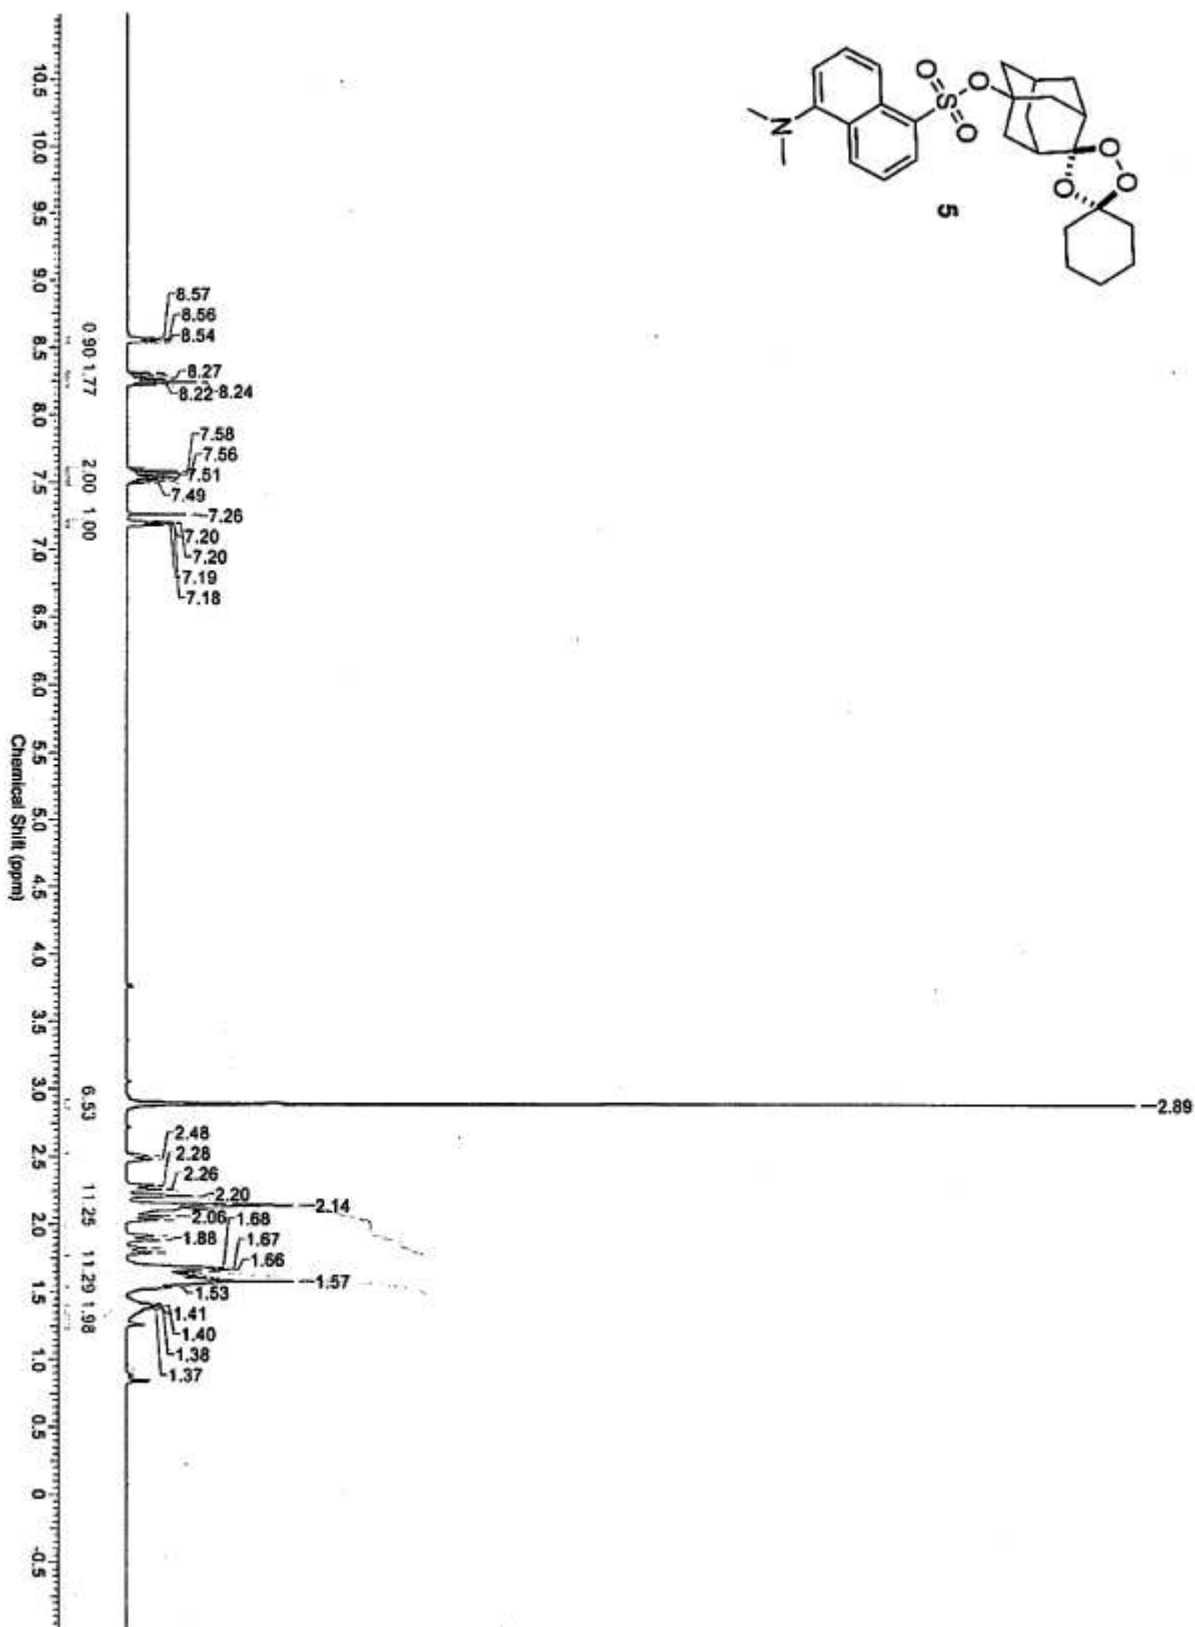

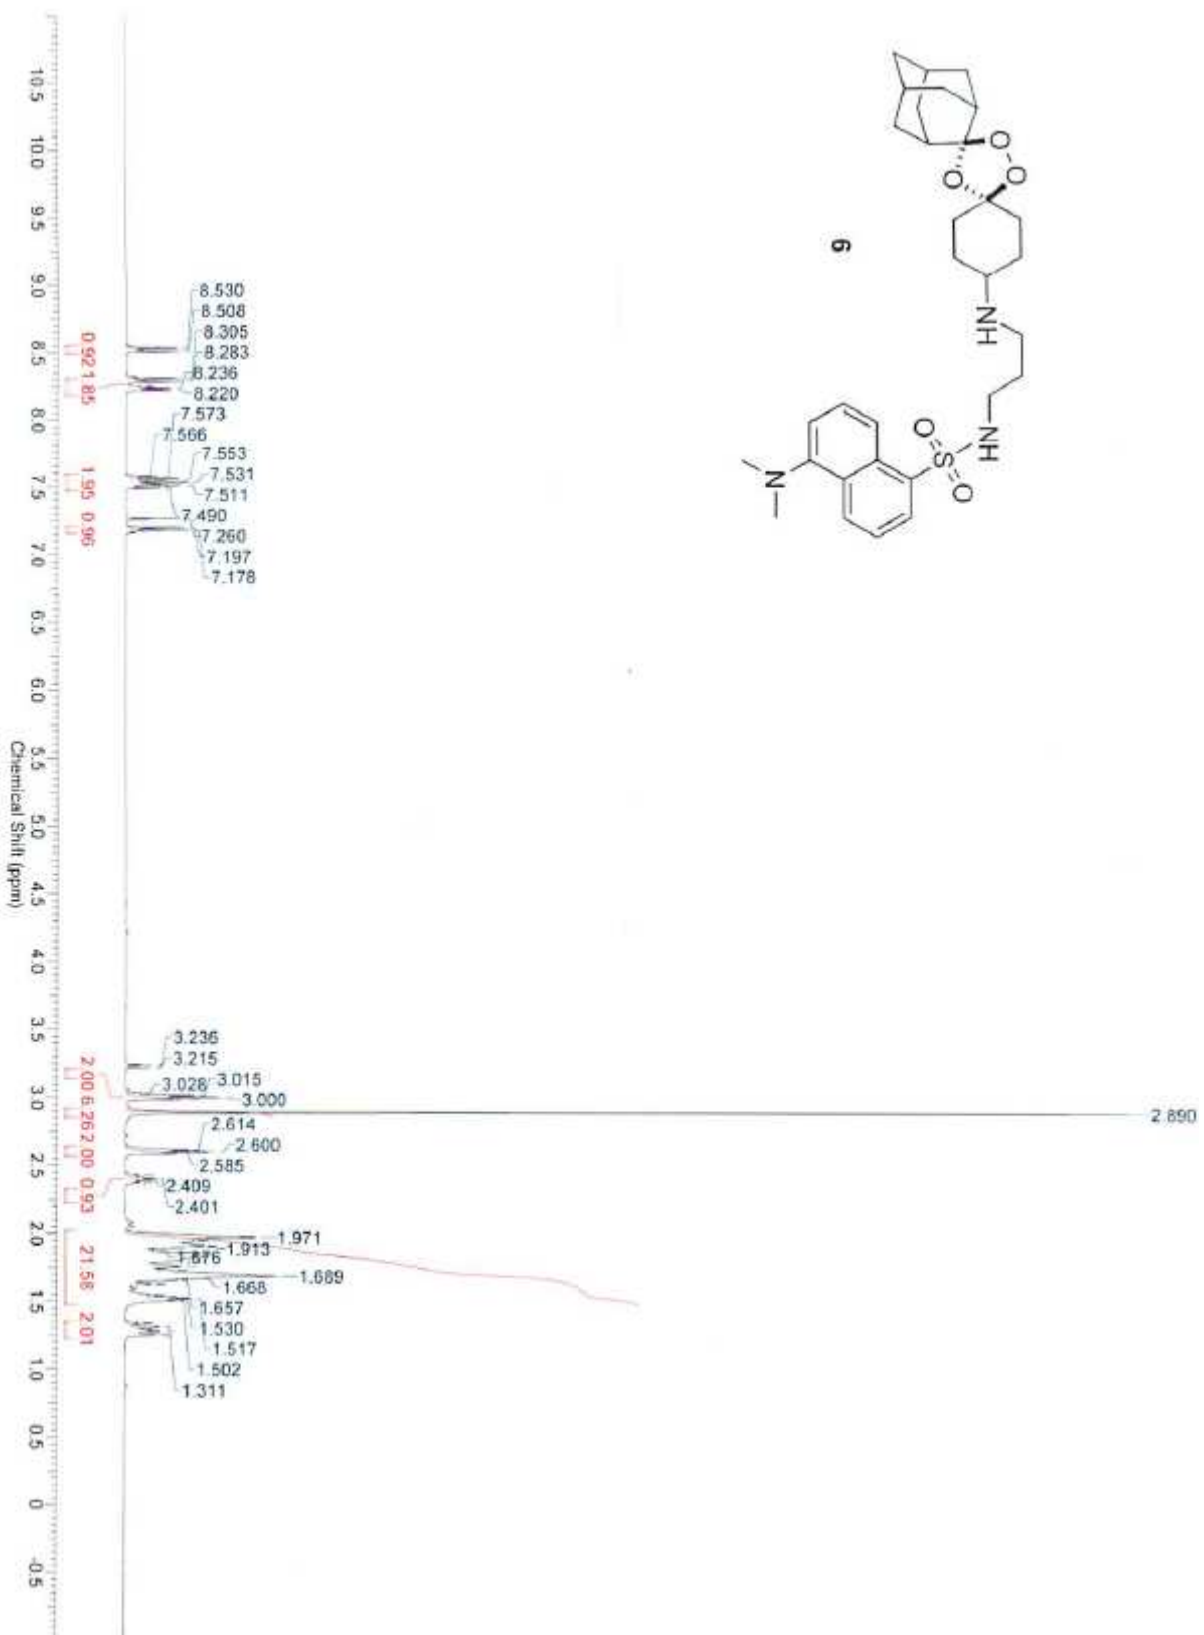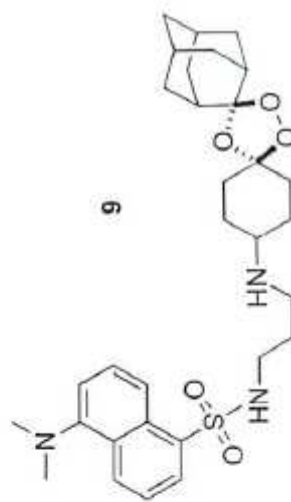

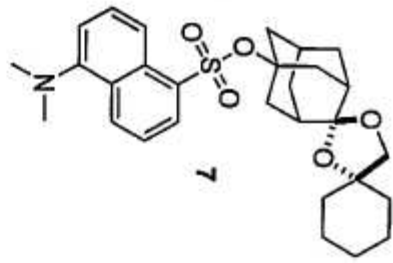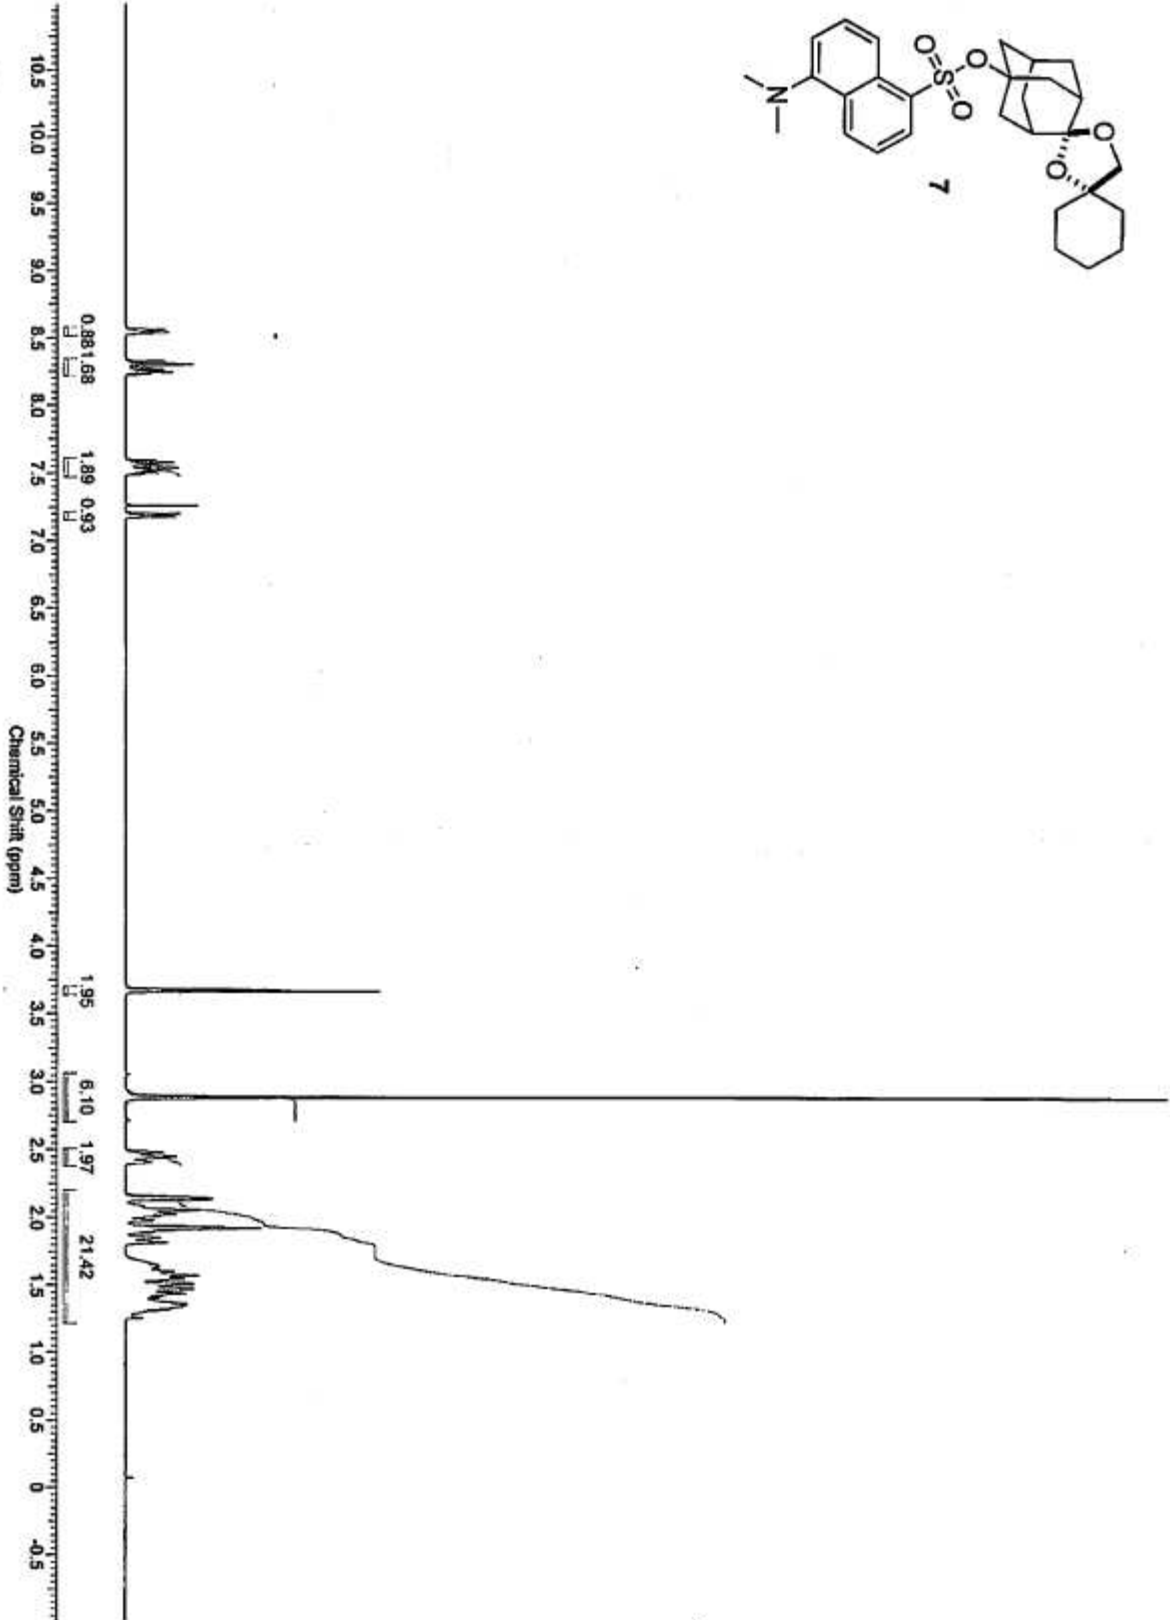

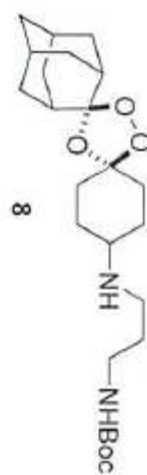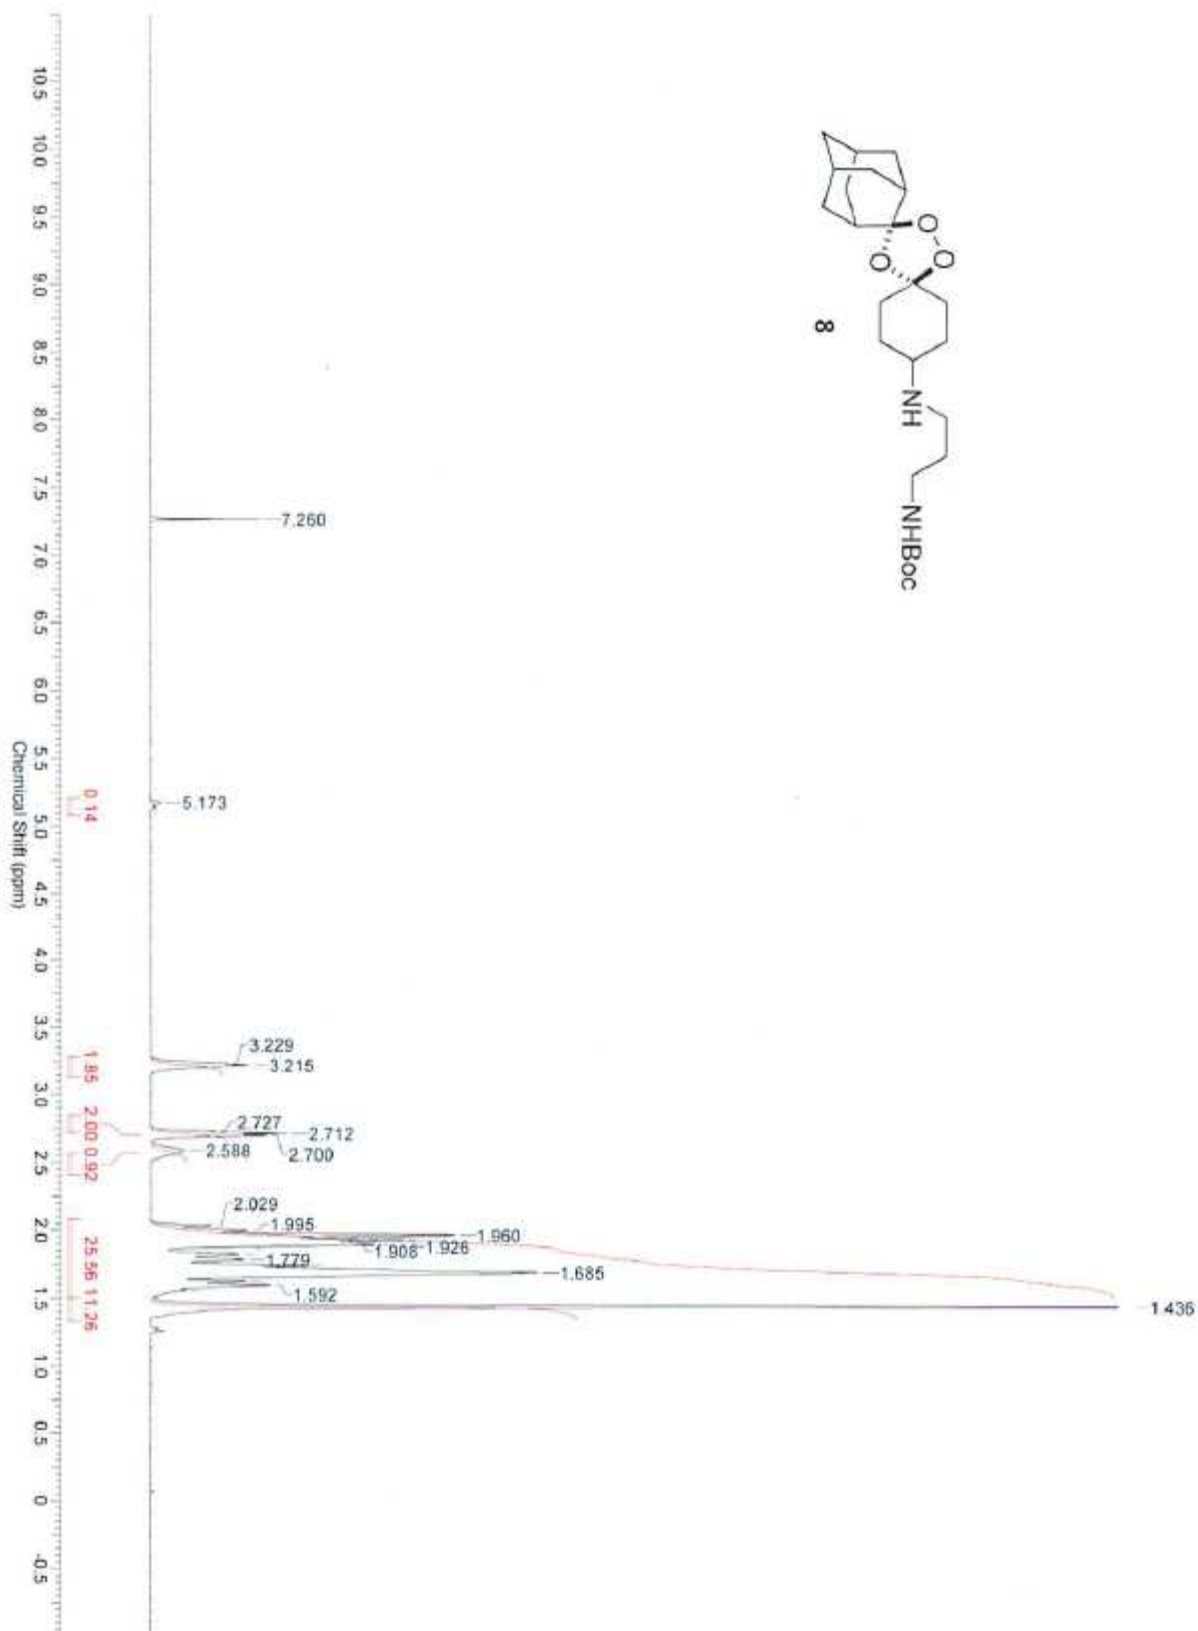

Supplement: NIHMS337549-supplement-1_si_001.pdf [file NIHMS337549-supplement-1_si_001.pdf]
